# Supplementary material for: Auxosporulation in Paralia guyana MacGillivary (Bacillariophyta) and Possible New Insights into the Habit of the Earliest Diatoms
Source: PLoS One. 2015 Oct 20;10(10):e0141150. doi: 10.1371/journal.pone.0141150 (PMC4618869; doi:10.1371/journal.pone.0141150)
Supplement: S1 Spreadsheet — Worksheet “Parent + Initial Cell Diameters” contains original measurements and summary statistics for parent and initial cell diameters, organized by clone and cell type. This data was used to generate Fig 2. Worksheet “Other Metrics” contains original measurements and summary statistics for valve structures reported as means in the text: incunabular scale diameters, copulae slits in 10 μm associated with initial and vegetative valves, and initial cell pores in 10 μm. (XLS) [file pone.0141150.s001.xls]

## Sheet: Parent + Initial Cell Diameters
Data for Figure 2
Cell Type: P = parental; IC = initial cell					Summary Statistics by Clone and Cell Type:
Clone	Cell Type	Diameter (µm)			Clone	Cell Type	Mean (µm)	SD (µm)	Min (µm)	Max (µm)	N
GP1	P	11.064			GP1	P	11.5461	1.50925	8.54	14.014	20
GP1	P	11.331			GP1	IC	31.229	5.36731	23.202	48.098	18
GP1	P	9.97
GP1	P	12.474			GP3	P	12.1659	1.4946	9.677	14.499	15
GP1	P	11.01			GP3	IC	35.5263	8.87911	19.32	49.618	15
GP1	P	11.314
GP1	P	11.417			W1C2	P	17.0842	6.25554	10.671	35.382	22
GP1	P	11.28			W1C2	IC	36.6482	5.44612	25.975	49.095	34
GP1	P	8.898
GP1	P	8.54			All Clones	P	13.8467	4.77184	8.54	35.382	57
GP1	P	10.53			All Clones	IC	34.9411	6.65664	19.32	49.618	67
GP1	P	12.5
GP1	P	11.965
GP1	P	10.23
GP1	P	13.79
GP1	P	13.28
GP1	P	13.722
GP1	P	14.014
GP1	P	11.387
GP1	P	12.206
GP1	IC	30.057
GP1	IC	31.314
GP1	IC	30.636
GP1	IC	23.202
GP1	IC	30.294
GP1	IC	30.124
GP1	IC	31.746
GP1	IC	26.039
GP1	IC	35.6527
GP1	IC	26.255
GP1	IC	34.677
GP1	IC	29.808
GP1	IC	25.121
GP1	IC	32.856
GP1	IC	30.286
GP1	IC	31.473
GP1	IC	48.098
GP1	IC	34.483
GP3	P	11.574
GP3	P	11.146
GP3	P	9.677
GP3	P	14.499
GP3	P	13.821
GP3	P	10.847
GP3	P	13.636
GP3	P	11.21
GP3	P	10.657
GP3	P	12.452
GP3	P	13.87
GP3	P	11.31
GP3	P	11.63
GP3	P	11.91
GP3	P	14.25
GP3	IC	42.763
GP3	IC	42.455
GP3	IC	41.885
GP3	IC	34.427
GP3	IC	49.618
GP3	IC	31.746
GP3	IC	19.32
GP3	IC	31.93
GP3	IC	31.5
GP3	IC	30.582
GP3	IC	19.88
GP3	IC	29.208
GP3	IC	42.1
GP3	IC	43.29
GP3	IC	42.19
W1C2	P	13.989
W1C2	P	15.984
W1C2	P	18.004
W1C2	P	16.93
W1C2	P	24.225
W1C2	P	15.954
W1C2	P	12.905
W1C2	P	14.902
W1C2	P	16.09
W1C2	P	13.991
W1C2	P	13.882
W1C2	P	14.53
W1C2	P	13.892
W1C2	P	10.671
W1C2	P	14.611
W1C2	P	13.106
W1C2	P	25.937
W1C2	P	30.227
W1C2	P	13.419
W1C2	P	16.013
W1C2	P	35.382
W1C2	P	11.209
W1C2	IC	40.018
W1C2	IC	36.892
W1C2	IC	39.164
W1C2	IC	35.659
W1C2	IC	42.229
W1C2	IC	44.11
W1C2	IC	25.975
W1C2	IC	37.5
W1C2	IC	41.774
W1C2	IC	30.417
W1C2	IC	31.393
W1C2	IC	37.413
W1C2	IC	42.921
W1C2	IC	42.677
W1C2	IC	49.095
W1C2	IC	34
W1C2	IC	43.116
W1C2	IC	32.658
W1C2	IC	33.334
W1C2	IC	35.477
W1C2	IC	34.507
W1C2	IC	33.092
W1C2	IC	26.415
W1C2	IC	30.479
W1C2	IC	32.699
W1C2	IC	31.324
W1C2	IC	40.305
W1C2	IC	32.866
W1C2	IC	37.976
W1C2	IC	30.814
W1C2	IC	38.139
W1C2	IC	39.069
W1C2	IC	36.828
W1C2	IC	45.704

## Sheet: Other Metrics
	Incunabular Scale Diameters (µm)	Copulae Slits (in 10 µm) Associated with Initial and Vegetative Valves	Initial Cell Pores (in 10 µm)
	1.648	37.84	33.82
	1.83	35.81	35.19
	1.921	41.98	27.95
	2.022	34.892	36.74
	1.902	34.572	36.704
	2.61	33.78	33.61
	2.99	41.67	34.871
	2.07	34.8	38.051
	3.783	41.41	29.382
	2.305	38.7	38.9105
	1.91	31.01	29.2056
	1.982	38.65	27.4
	1.8	40.92	28.8
	1.96	31.414	35
	1.768	39.23	36.5
	2.131		38.7
	1.822		39
	1.932		39.7
	1.95		31
	1.976		34.014
	1.691		44
	1.871		33.11
	2.048		30.326
	1.67		36.86
	1.916		34.883
	2.383
	1.605
	1.983
	2.233
	1.753
	2.217
	2.15
	2.335
	2.258
	1.983
	2.38
	1.958
	1.85
Mean:	2.06832	37.1119	34.5491
SD:	0.39754	3.65058	4.18708
Min:	1.605	31.01	27.4
Max:	3.783	41.98	44
N:	38	15	25
